# Supplementary material for: Reducing wait times for access to inpatient rehabilitation for patients with acquired brain injury: a quality improvement initiative
Source: PubMed Central journal article supplement — BMJ Open Qual. 2024 Dec 7;13(4):e002915. doi: 10.1136/bmjoq-2024-002915 (PMC11628993; doi:10.1136/bmjoq-2024-002915), 2024-12-07
Supplement: bmjoq-13-4-s001.pdf [file bmjoq-13-4-s001.pdf]

## Referral Checklist

*This checklist is a resource tool to be used prior to completing the Complex Care Rehabilitation Application for admission to Community Re-integration Unit or Slow to recover stream. The checklist will assist in determining if your patient meets criteria, is rehab ready and if any outstanding items need to be achieved.*

### DEMOGRAPHICS

- Age 16 or older
- Ontario resident
- Moderate or severe brain injury
- Functional Impairments *different from prior baseline* due to the following new diagnoses responsible for current hospital admission: Traumatic Brain Injury, Anoxic/Hypoxic Brain Injury, Intracranial aneurysms or hemorrhages, or Encephalitis
- Consideration may be given to patients with:
  - A primary benign brain tumour, once surgical and/or adjuvant treatment has been completed
  - Ischemic stroke with cognitive or behavioral impairments not able to be addressed on an inpatient stroke rehab unit
  - Concurrent medical conditions that may affect rehab participation

### MEDICALLY STABLE / NO ACUTE MEDICAL ISSUES:

- No Ventilators
- Stable respiratory status and tracheostomy
- No nasogastric tubes
- No active suicidal plan and/or psychosis
- All diagnostic investigations completed
- Plans for pending surgical procedures (e.g. Bone flap insertion) or medical treatment (i.e. dialysis, addictions treatment) are specified on the referral form
- Stable vitals and laboratory results (no significant fluctuation in medical status within 72 hours prior to admission)
- No significant wound impeding ability to participate in high intensity rehab
- Referral is not due to impairments due to a progressive or degenerative disorder (e.g.: Cancer, dementia, Parkinson's, etc.)
- Not undergoing radiation or chemotherapy that would affect rehab participation

### REHAB READY:

- Consistently follows one-step commands
- Demonstrates potential for improvement (i.e. carryover of new learning)
- Have completed a formal occupational and/or physiotherapy and/or speech language pathologist assessment with achievable rehab goals specified on the referral form

### DISCHARGE DESTINATION DISCUSSION:

- Repatriation Agreement will be required prior to admission
- Discharge planning and resources initiated in their community
- Discussion has taken place with patient and family regarding support and resources at home where applicable
