# Supplementary material for: Reducing wait times for access to inpatient rehabilitation for patients with acquired brain injury: a quality improvement initiative
Source: PubMed Central journal article supplement — BMJ Open Qual. 2024 Dec 7;13(4):e002915. doi: 10.1136/bmjoq-2024-002915 (PMC11628993; doi:10.1136/bmjoq-2024-002915), 2024-12-07
Supplement: bmjoq-13-4-s003.pdf [file bmjoq-13-4-s003.pdf]

# Inpatient ABI Rehab Intake Process

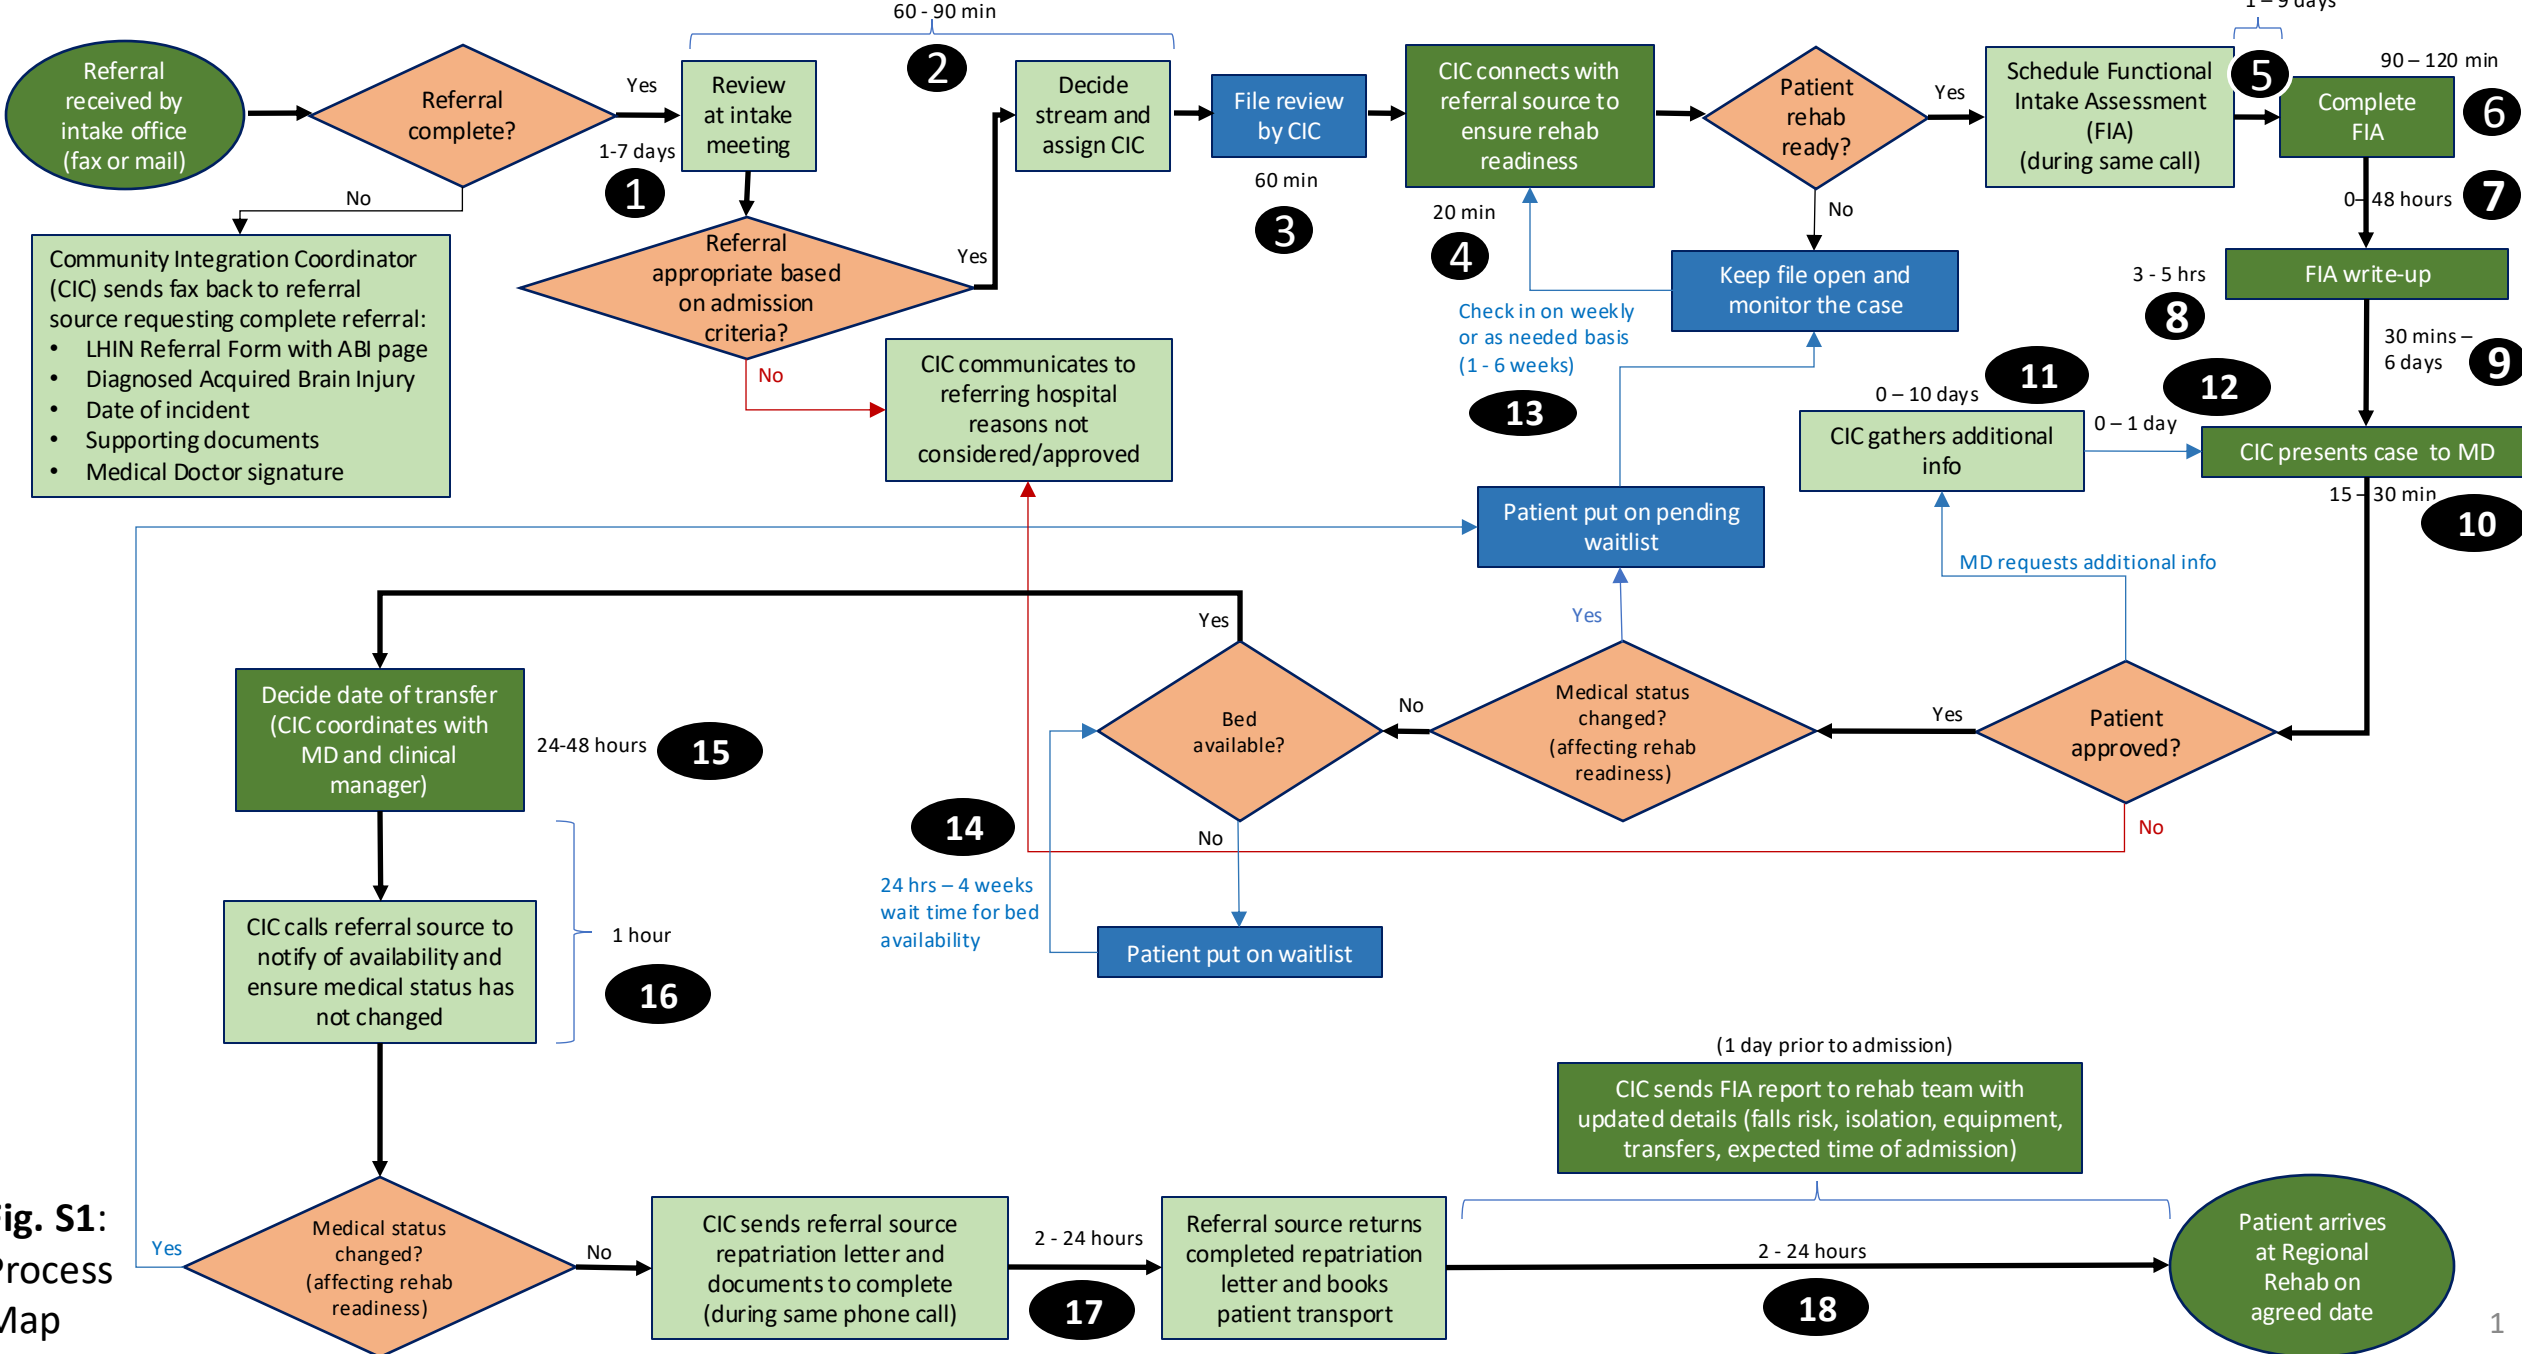

**Fig. S1:**  
Process  
Map

## Legend for Figure S1 (ABI Intake Process Map)

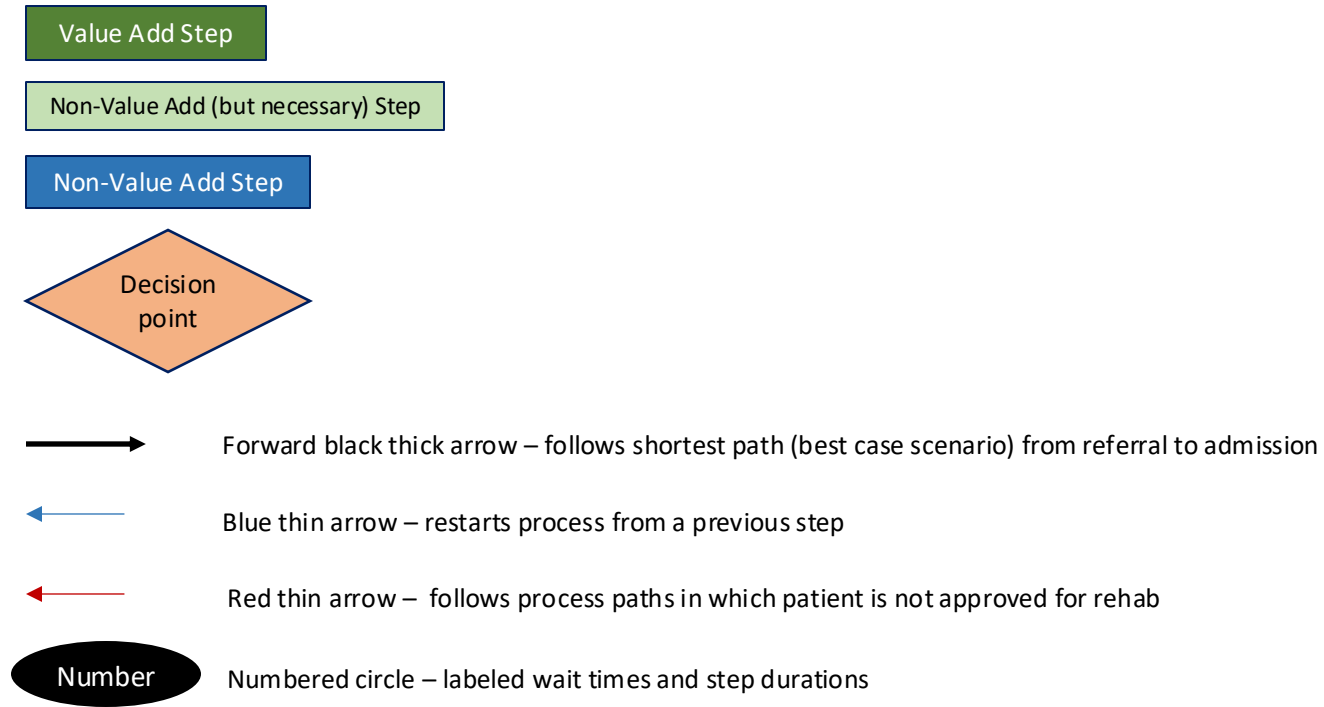

*Please note: decision points and steps not labeled with a duration occur immediately after the previous step*

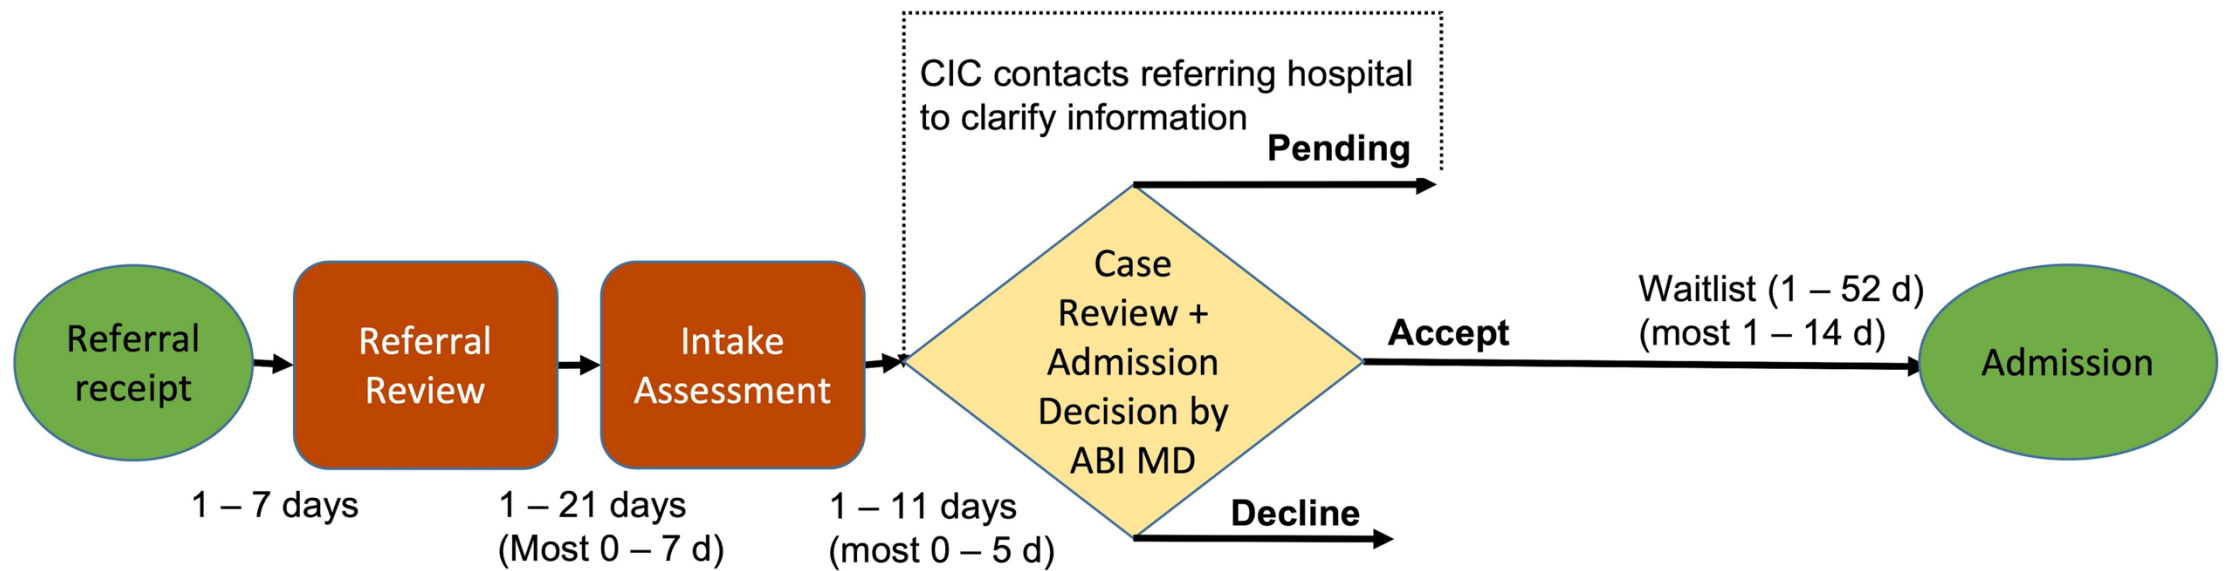

**Figure S2:** Simplified diagram of ABI referral and intake process.

CIC = Community Intervention Coordinator (intake coordinator); MD = physician; d = days

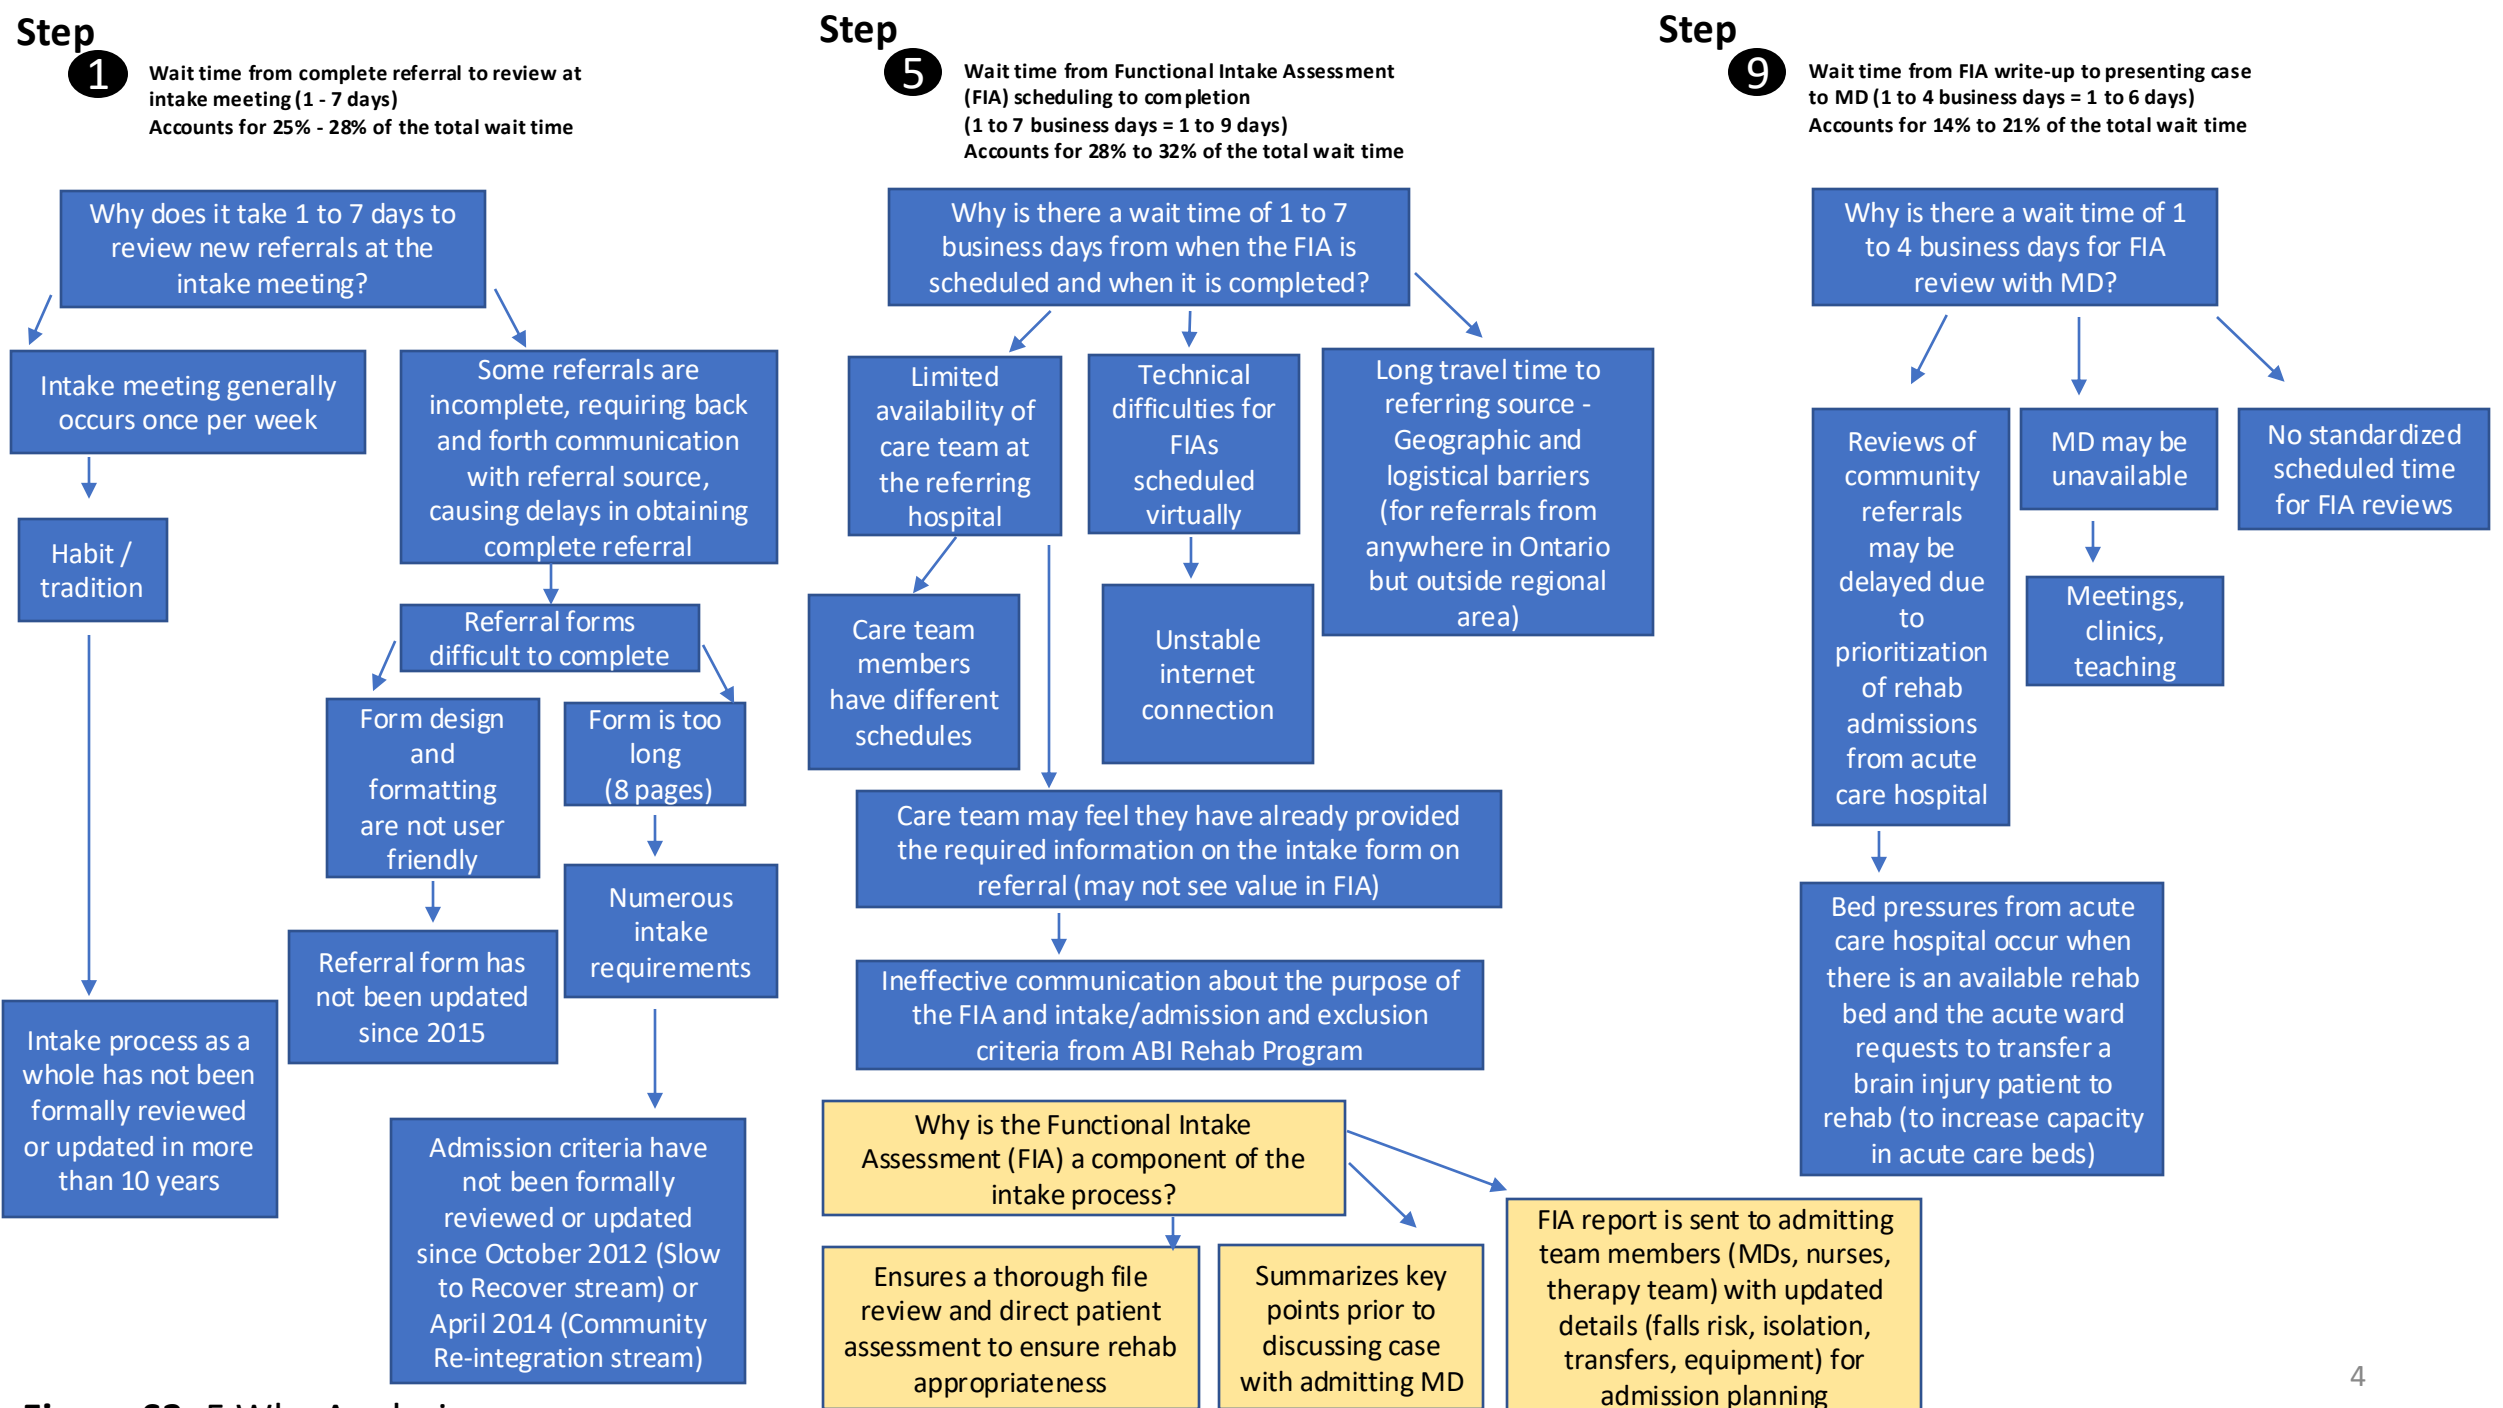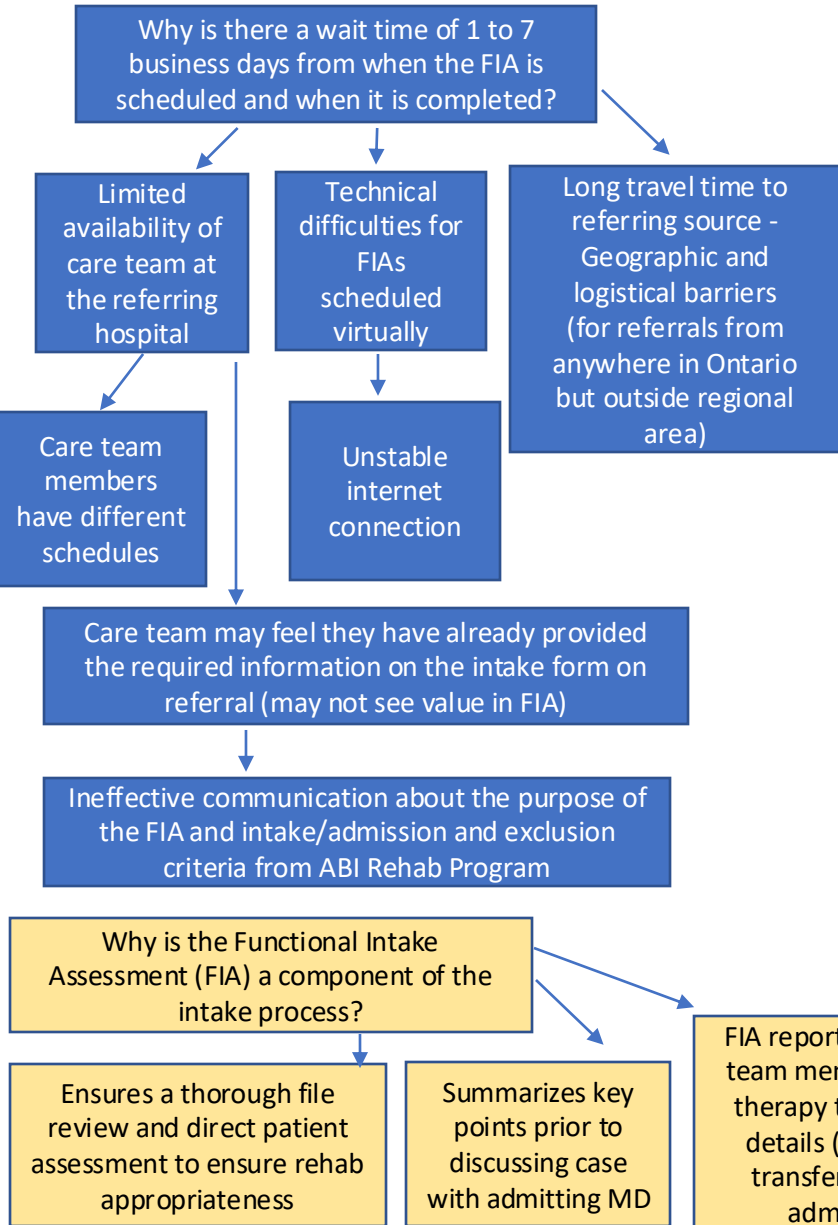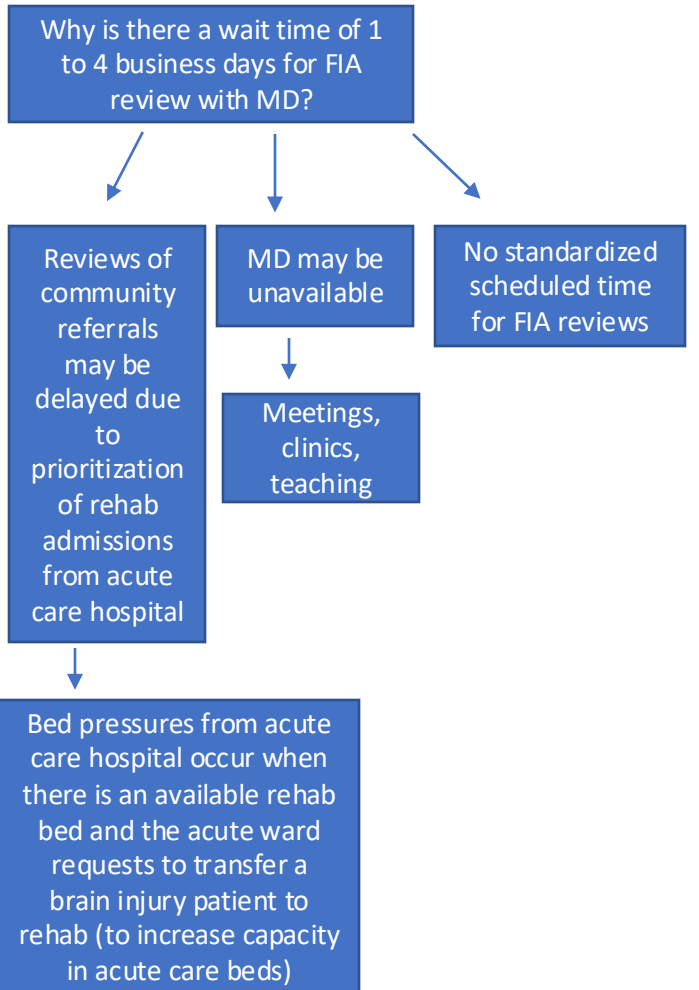

**Figure S3: 5 Why Analysis**
